# Supplementary material
Source: PubMed Central journal article supplement (PMC4522954)
Supplement: Supp_Figure1.pdf [file Supp_Figure1.pdf]

## Supplementary Data

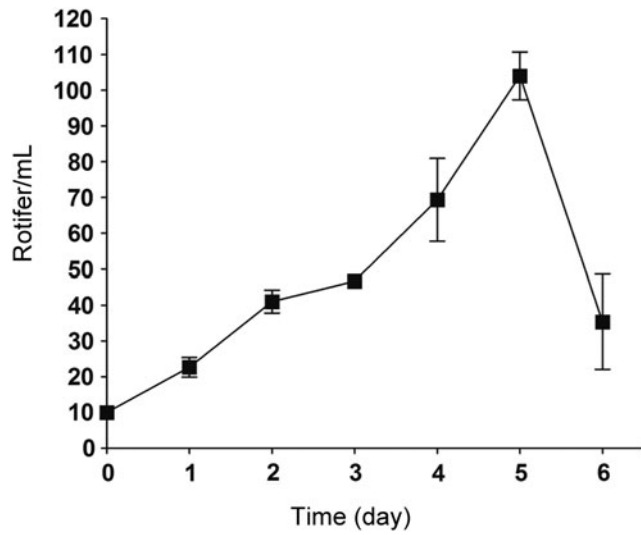

**SUPPLEMENTARY FIG. S1.** The growth curve of freshwater rotifers (*Brachionus calyciflorus*) in a 1-L culture. The density of rotifers was measured each day and plotted. The mean  $\pm$  SEM is presented ( $n=3$ ).
