# Supplementary material
Source: PubMed Central journal article supplement (PMC4522954)
Supplement: Supp_Figure2.pdf [file Supp_Figure2.pdf]

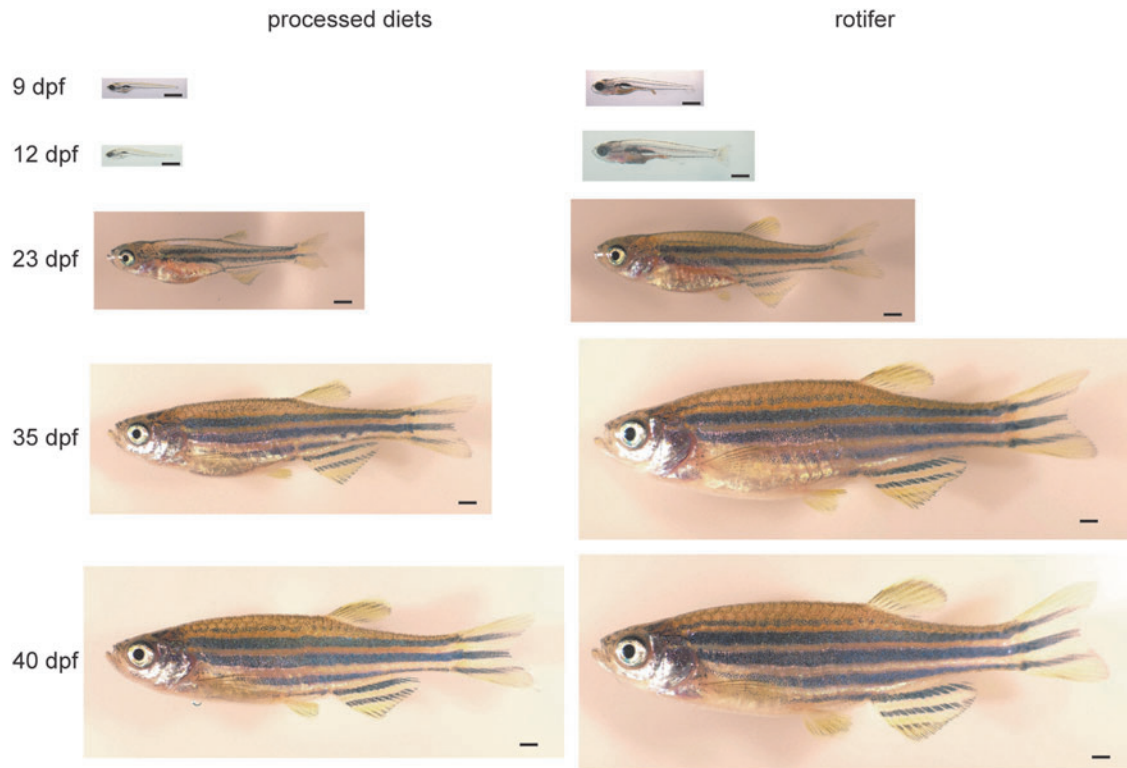

**SUPPLEMENTARY FIG. S2.** Growing larval zebrafish (*Danio rerio*) fed with freshwater rotifers (*B. calyciflorus*) (right column) or a processed diet (left column). The larvae fed with rotifers were consistently larger than the larvae fed with the processed diet, even after brine shrimp (*Artemia* spp.) were provided. The age of the larvae is given on the left. The bars represent 1 mm.
